# Supplementary material for: A Comparison of Web and Telephone Responses From a National HIV and AIDS Survey
Source: PubMed Central journal article supplement (PMC4994958; doi:10.2196/publichealth.5184), 2016-07-29
Supplement: publichealth_v2i2e37_app2.pdf [file publichealth_v2i2e37_app2.pdf]

**Supplementary Table 1:** Logistic regression analysis of association between mode of questionnaire completion and reporting more than 1 sexual partner in the last 12 months (n=1424).

| Variable                  | Response Category    | Socio-demographic adjusted |      |       | Socio-demographic and propensity score adjusted |      |        |
|---------------------------|----------------------|----------------------------|------|-------|-------------------------------------------------|------|--------|
|                           |                      | Odds Ratio                 | LLC  | ULC   | Odds Ratio                                      | LLC  | ULC    |
| <b>Mode of completion</b> | Telephone            | 1.00                       | -    | -     | 1.00                                            | -    | -      |
|                           | Web                  | 3.76                       | 1.86 | 7.58  | 3.65                                            | 1.80 | 7.41   |
| <b>Age</b>                | 18-24                | 1.00                       | -    | -     | 1.00                                            | -    | -      |
|                           | 25-39                | 0.42                       | 0.25 | 0.71  | 0.43                                            | 0.25 | 0.72   |
|                           | 40-49                | 0.21                       | 0.11 | 0.40  | 0.25                                            | 0.12 | 0.52   |
|                           | 50-59                | 0.17                       | 0.09 | 0.32  | 0.20                                            | 0.09 | 0.45   |
|                           | 60+                  | 0.08                       | 0.04 | 0.19  | 0.11                                            | 0.04 | 0.31   |
| <b>Gender</b>             | Male                 | 1.00                       | -    | -     | 1.00                                            | -    | -      |
|                           | Female               | 0.49                       | 0.34 | 0.71  | 0.50                                            | 0.34 | 0.72   |
| <b>Education</b>          | ≤High school         | 1.00                       | -    | -     | 1.00                                            | -    | -      |
|                           | College              | 1.00                       | 0.57 | 1.75  | 0.68                                            | 0.24 | 1.92   |
|                           | University           | 0.71                       | 0.40 | 1.25  | 0.45                                            | 0.14 | 1.47   |
|                           | Grad/Post-Grad       | 0.86                       | 0.44 | 1.69  | 0.51                                            | 0.13 | 1.97   |
| <b>Income</b>             | <\$40,000            | 1.00                       | -    | -     | 1.00                                            | -    | -      |
|                           | \$40,000-\$80,000    | 0.65                       | 0.40 | 1.05  | 0.56                                            | 0.32 | 0.99   |
|                           | >\$80,000            | 0.42                       | 0.25 | 0.70  | 0.33                                            | 0.15 | 0.69   |
|                           | Prefer not to answer | 0.28                       | 0.13 | 0.62  | 0.26                                            | 0.11 | 0.59   |
| <b>Region</b>             | West                 | 1.00                       | -    | -     | 1.00                                            | -    | -      |
|                           | Ontario              | 1.02                       | 0.65 | 1.60  | 1.10                                            | 0.68 | 1.79   |
|                           | Quebec               | 1.66                       | 1.02 | 2.69  | 1.89                                            | 1.08 | 3.30   |
|                           | East                 | 0.94                       | 0.45 | 1.95  | 0.98                                            | 0.47 | 2.08   |
|                           | Territories          | 4.01                       | 0.96 | 16.86 | 3.80                                            | 0.94 | 15.30  |
| <b>Sexual minority</b>    | No                   | 1.00                       | -    | -     | 1.00                                            | -    | -      |
|                           | Yes                  | 5.70                       | 3.30 | 9.86  | 4.97                                            | 2.62 | 9.40   |
| <b>Propensity score</b>   |                      |                            |      |       | 7.68                                            | 0.06 | 939.11 |

LLC=lower limit of 95% confidence interval, ULC= upper limit of 95% confidence interval

**Supplementary Table 2:** Linear regression of association between mode of questionnaire completion and agreement<sup>a</sup> with statement “I feel afraid of people living with HIV/AIDS” (n=2008).

| Variable                  | Response Category    | Socio-demographic adjusted |        |        | Socio-demographic and propensity score adjusted |        |        |
|---------------------------|----------------------|----------------------------|--------|--------|-------------------------------------------------|--------|--------|
|                           |                      | $\beta$ Coefficient        | LLC    | ULC    | $\beta$ Coefficient                             | LLC    | ULC    |
| <b>Mode of completion</b> | Telephone            | 0.000                      | -      | -      | 0.000                                           | -      | -      |
|                           | Web                  | 0.000                      | -0.231 | 0.231  | 0.019                                           | -0.214 | 0.251  |
| <b>Age</b>                | 18-24                | 0.000                      | -      | -      | 0.000                                           | -      | -      |
|                           | 25-39                | -0.018                     | -0.308 | 0.272  | -0.043                                          | -0.334 | 0.248  |
|                           | 40-49                | -0.067                     | -0.383 | 0.250  | -0.204                                          | -0.559 | 0.152  |
|                           | 50-59                | -0.168                     | -0.472 | 0.137  | -0.312                                          | -0.658 | 0.034  |
|                           | 60+                  | 0.119                      | -0.186 | 0.424  | -0.123                                          | -0.540 | 0.293  |
| <b>Gender</b>             | Male                 | 0.000                      | -      | -      | 0.000                                           | -      | -      |
|                           | Female               | -0.403                     | -0.562 | -0.245 | -0.425                                          | -0.586 | -0.264 |
| <b>Education</b>          | ≤High school         | 0.000                      | -      | -      | 0.000                                           | -      | -      |
|                           | College              | -0.173                     | -0.414 | 0.068  | 0.179                                           | -0.293 | 0.651  |
|                           | University           | -0.264                     | -0.510 | -0.017 | 0.164                                           | -0.390 | 0.718  |
|                           | Grad/Post-Grad       | -0.482                     | -0.755 | -0.208 | 0.013                                           | -0.616 | 0.641  |
| <b>Income</b>             | <\$40,000            | 0.000                      | -      | -      | 0.000                                           | -      | -      |
|                           | \$40,000-\$80,000    | -0.282                     | -0.515 | -0.050 | -0.142                                          | -0.430 | 0.146  |
|                           | >\$80,000            | -0.330                     | -0.561 | -0.100 | -0.098                                          | -0.458 | 0.262  |
|                           | Prefer not to answer | -0.071                     | -0.349 | 0.207  | 0.016                                           | -0.282 | 0.314  |
| <b>Region</b>             | West                 | 0.000                      | -      | -      | 0.000                                           | -      | -      |
|                           | Ontario              | 0.069                      | -0.114 | 0.253  | 0.000                                           | -0.199 | 0.199  |
|                           | Quebec               | 0.518                      | 0.293  | 0.743  | 0.398                                           | 0.134  | 0.661  |
|                           | East                 | 0.171                      | -0.165 | 0.507  | 0.119                                           | -0.223 | 0.461  |
|                           | Territories          | 0.273                      | -0.400 | 0.946  | 0.340                                           | -0.341 | 1.021  |
| <b>Sexual minority</b>    | No                   | 0.000                      | -      | -      | 0.000                                           | -      | -      |
|                           | Yes                  | -0.690                     | -1.009 | -0.371 | -0.574                                          | -0.912 | -0.235 |
| <b>Propensity score</b>   |                      |                            |        |        | -1.567                                          | -3.474 | 0.341  |

LLC=lower limit of 95% confidence interval, ULC= upper limit of 95% confidence interval

<sup>a</sup>1-7 Likert scale; 1=completely disagree, 4=neither agree nor disagree, 7=completely agree

**Supplementary Table 3:** Linear regression of association between mode of questionnaire completion and level of comfort<sup>a</sup> with statement “How comfortable or uncomfortable would you be with shopping at a small neighbourhood grocery store, if you found out that the owner had HIV/AIDS?” (n=1934).

| Variable                  | Response Category    | Socio-demographic adjusted |       |       | Socio-demographic and propensity score adjusted |       |      |
|---------------------------|----------------------|----------------------------|-------|-------|-------------------------------------------------|-------|------|
|                           |                      | $\beta$ Coefficient        | LLC   | ULC   | $\beta$ Coefficient                             | LLC   | ULC  |
| <b>Mode of completion</b> | Telephone            | 0.00                       | -     | -     | 0.00                                            | -     | -    |
|                           | Web                  | 0.09                       | -0.03 | 0.21  | 0.07                                            | -0.05 | 0.19 |
| <b>Age</b>                | 18-24                | 0.00                       | -     | -     | 0.00                                            | -     | -    |
|                           | 25-39                | 0.11                       | -0.05 | 0.27  | 0.13                                            | -0.02 | 0.29 |
|                           | 40-49                | 0.09                       | -0.09 | 0.26  | 0.21                                            | 0.02  | 0.40 |
|                           | 50-59                | -0.09                      | -0.26 | 0.08  | 0.04                                            | -0.15 | 0.23 |
|                           | 60+                  | -0.25                      | -0.41 | -0.08 | -0.02                                           | -0.24 | 0.20 |
| <b>Gender</b>             | Male                 | 0.00                       | -     | -     | 0.00                                            | -     | -    |
|                           | Female               | 0.16                       | 0.07  | 0.24  | 0.18                                            | 0.09  | 0.26 |
| <b>Education</b>          | ≤High school         | 0.00                       | -     | -     | 0.00                                            | -     | -    |
|                           | College              | 0.18                       | 0.05  | 0.31  | -0.14                                           | -0.41 | 0.13 |
|                           | University           | 0.33                       | 0.20  | 0.46  | -0.06                                           | -0.38 | 0.26 |
|                           | Grad/Post-Grad       | 0.47                       | 0.32  | 0.62  | 0.02                                            | -0.35 | 0.38 |
| <b>Income</b>             | <\$40,000            | 0.00                       | -     | -     | 0.00                                            | -     | -    |
|                           | \$40,000-\$80,000    | -0.01                      | -0.13 | 0.11  | -0.14                                           | -0.28 | 0.01 |
|                           | >\$80,000            | 0.03                       | -0.09 | 0.15  | -0.18                                           | -0.37 | 0.01 |
|                           | Prefer not to answer | -0.08                      | -0.24 | 0.07  | -0.16                                           | -0.33 | 0.00 |
| <b>Region</b>             | West                 | 0.00                       | -     | -     | 0.00                                            | -     | -    |
|                           | Ontario              | -0.04                      | -0.15 | 0.07  | 0.02                                            | -0.09 | 0.14 |
|                           | Quebec               | 0.04                       | -0.07 | 0.15  | 0.15                                            | 0.02  | 0.29 |
|                           | East                 | 0.04                       | -0.12 | 0.21  | 0.09                                            | -0.08 | 0.26 |
|                           | Territories          | -0.32                      | -0.69 | 0.05  | -0.38                                           | -0.76 | 0.01 |
| <b>Sexual minority</b>    | No                   | 0.00                       | -     | -     | 0.00                                            | -     | -    |
|                           | Yes                  | 0.19                       | -0.01 | 0.39  | 0.09                                            | -0.13 | 0.30 |
| <b>Propensity score</b>   |                      |                            |       |       | 1.43                                            | 0.39  | 2.47 |

LLC=lower limit of 95% confidence interval, ULC= upper limit of 95% confidence interval

<sup>a</sup>1-4 Likert scale; 1=very uncomfortable, 4=very comfortable

**Supplementary Table 4:** Logistic regression analysis of association between mode of questionnaire completion and donation to charity in the last year (n=1996).

| Variable                  | Response Category    | Socio-demographic adjusted |      |       | Socio-demographic and propensity score adjusted |      |       |
|---------------------------|----------------------|----------------------------|------|-------|-------------------------------------------------|------|-------|
|                           |                      | Odds Ratio                 | LLC  | ULC   | Odds Ratio                                      | LLC  | ULC   |
| <b>Mode of completion</b> | Telephone            | 1.00                       | -    | -     | 1.00                                            | -    | -     |
|                           | Web                  | 1.61                       | 1.15 | 2.27  | 1.63                                            | 1.15 | 2.29  |
| <b>Age</b>                | 18-24                | 1.00                       | -    | -     | 1.00                                            | -    | -     |
|                           | 25-39                | 1.34                       | 0.87 | 2.07  | 1.33                                            | 0.86 | 2.06  |
|                           | 40-49                | 2.19                       | 1.34 | 3.58  | 2.06                                            | 1.14 | 3.74  |
|                           | 50-59                | 3.38                       | 2.06 | 5.56  | 3.17                                            | 1.72 | 5.84  |
|                           | 60+                  | 6.33                       | 3.83 | 10.47 | 5.64                                            | 2.58 | 12.31 |
| <b>Gender</b>             | Male                 | 1.00                       | -    | -     | 1.00                                            | -    | -     |
|                           | Female               | 1.74                       | 1.33 | 2.28  | 1.73                                            | 1.31 | 2.27  |
| <b>Education</b>          | ≤High school         | 1.00                       | -    | -     | 1.00                                            | -    | -     |
|                           | College              | 1.29                       | 0.89 | 1.87  | 1.47                                            | 0.66 | 3.26  |
|                           | University           | 1.75                       | 1.17 | 2.60  | 2.05                                            | 0.79 | 5.36  |
|                           | Grad/Post-Grad       | 1.70                       | 1.02 | 2.83  | 2.05                                            | 0.68 | 6.22  |
| <b>Income</b>             | <\$40,000            | 1.00                       | -    | -     | 1.00                                            | -    | -     |
|                           | \$40,000-\$80,000    | 2.88                       | 2.03 | 4.11  | 3.04                                            | 1.93 | 4.78  |
|                           | >\$80,000            | 3.05                       | 2.10 | 4.43  | 3.33                                            | 1.78 | 6.22  |
|                           | Prefer not to answer | 2.10                       | 1.34 | 3.29  | 2.17                                            | 1.34 | 3.52  |
| <b>Region</b>             | West                 | 1.00                       | -    | -     | 1.00                                            | -    | -     |
|                           | Ontario              | 0.83                       | 0.59 | 1.17  | 0.81                                            | 0.55 | 1.18  |
|                           | Quebec               | 0.49                       | 0.34 | 0.71  | 0.47                                            | 0.30 | 0.73  |
|                           | East                 | 0.58                       | 0.35 | 0.97  | 0.57                                            | 0.33 | 0.96  |
|                           | Territories          | 1.39                       | 0.17 | 11.32 | 1.41                                            | 0.18 | 11.23 |
| <b>Sexual minority</b>    | No                   | 1.00                       | -    | -     | 1.00                                            | -    | -     |
|                           | Yes                  | 1.68                       | 0.86 | 3.27  | 1.76                                            | 0.87 | 3.56  |
| <b>Propensity score</b>   |                      |                            |      |       | 0.54                                            | 0.02 | 13.67 |

LLC=lower limit of 95% confidence interval, ULC= upper limit of 95% confidence interval

**Supplementary Table 5:** Linear regression of association between mode of questionnaire completion and self-perceived HIV knowledge (n=2022).

| Variable                  | Response Category    | Socio-demographic adjusted |       |       | Socio-demographic and propensity score adjusted |       |       |
|---------------------------|----------------------|----------------------------|-------|-------|-------------------------------------------------|-------|-------|
|                           |                      | $\beta$ Coefficient        | LLC   | ULC   | $\beta$ Coefficient                             | LLC   | ULC   |
| <b>Mode of completion</b> | Telephone            | 0.00                       | -     | -     | 0.00                                            | -     | -     |
|                           | Web                  | -0.06                      | -0.23 | 0.11  | -0.05                                           | -0.22 | 0.12  |
| <b>Age</b>                | 18-24                | 0.00                       | -     | -     | 0.00                                            | -     | -     |
|                           | 25-39                | 0.13                       | -0.09 | 0.34  | 0.11                                            | -0.10 | 0.33  |
|                           | 40-49                | -0.04                      | -0.27 | 0.20  | -0.09                                           | -0.35 | 0.16  |
|                           | 50-59                | -0.04                      | -0.28 | 0.19  | -0.11                                           | -0.36 | 0.15  |
|                           | 60+                  | -0.30                      | -0.52 | -0.07 | -0.40                                           | -0.69 | -0.11 |
| <b>Gender</b>             | Male                 | 0.00                       | -     | -     | 0.00                                            | -     | -     |
|                           | Female               | 0.12                       | 0.00  | 0.23  | 0.11                                            | -0.01 | 0.22  |
| <b>Education</b>          | ≤High school         | 0.00                       | -     | -     | 0.00                                            | -     | -     |
|                           | College              | 0.27                       | 0.10  | 0.45  | 0.42                                            | 0.08  | 0.77  |
|                           | University           | 0.42                       | 0.24  | 0.60  | 0.60                                            | 0.19  | 1.01  |
|                           | Grad/Post-Grad       | 0.58                       | 0.37  | 0.79  | 0.79                                            | 0.32  | 1.26  |
| <b>Income</b>             | <\$40,000            | 0.00                       | -     | -     | 0.00                                            | -     | -     |
|                           | \$40,000-\$80,000    | 0.11                       | -0.06 | 0.27  | 0.17                                            | -0.04 | 0.37  |
|                           | >\$80,000            | 0.13                       | -0.04 | 0.29  | 0.22                                            | -0.03 | 0.48  |
|                           | Prefer not to answer | 0.01                       | -0.20 | 0.22  | 0.04                                            | -0.18 | 0.27  |
| <b>Region</b>             | West                 | 0.00                       | -     | -     | 0.00                                            | -     | -     |
|                           | Ontario              | 0.13                       | -0.01 | 0.26  | 0.10                                            | -0.05 | 0.25  |
|                           | Quebec               | 0.51                       | 0.35  | 0.66  | 0.46                                            | 0.27  | 0.64  |
|                           | East                 | -0.16                      | -0.39 | 0.07  | -0.18                                           | -0.42 | 0.05  |
|                           | Territories          | -0.32                      | -0.75 | 0.10  | -0.29                                           | -0.72 | 0.13  |
| <b>Sexual minority</b>    | No                   | 0.00                       | -     | -     | 0.00                                            | -     | -     |
|                           | Yes                  | 0.84                       | 0.58  | 1.11  | 0.89                                            | 0.61  | 1.17  |
| <b>Propensity score</b>   |                      |                            |       |       | -0.66                                           | -2.01 | 0.68  |

LLC=lower limit of 95% confidence interval, ULC= upper limit of 95% confidence interval

<sup>a</sup>1-7 Likert scale; 1=not at all knowledgeable, 4=moderately knowledgeable, 7=extremely knowledgeable

**Supplementary Table 6:** Logistic regression analysis of association between mode of questionnaire completion and missing/DK response for HIV/AIDS testing (n=2027).

| Variable                  | Response Category    | Socio-demographic adjusted |      |       | Socio-demographic and propensity score adjusted |      |       |
|---------------------------|----------------------|----------------------------|------|-------|-------------------------------------------------|------|-------|
|                           |                      | Odds Ratio                 | LLC  | ULC   | Odds Ratio                                      | LLC  | ULC   |
| <b>Mode of completion</b> | Telephone            | 1.00                       | -    | -     | 1.00                                            | -    | -     |
|                           | Web                  | 8.68                       | 2.63 | 28.65 | 8.04                                            | 2.46 | 26.29 |
| <b>Age</b>                | 18-24                | 1.00                       | -    | -     | 1.00                                            | -    | -     |
|                           | 25-39                | 1.17                       | 0.36 | 3.79  | 1.27                                            | 0.38 | 4.22  |
|                           | 40-49                | 2.40                       | 0.73 | 7.88  | 3.59                                            | 0.82 | 15.76 |
|                           | 50-59                | 3.39                       | 1.10 | 10.49 | 5.15                                            | 1.28 | 20.71 |
|                           | 60+                  | 2.38                       | 0.78 | 7.29  | 4.68                                            | 0.90 | 24.30 |
| <b>Gender</b>             | Male                 | 1.00                       | -    | -     | 1.00                                            | -    | -     |
|                           | Female               | 0.91                       | 0.58 | 1.44  | 0.97                                            | 0.60 | 1.57  |
| <b>Education</b>          | ≤High school         | 1.00                       | -    | -     | 1.00                                            | -    | -     |
|                           | College              | 0.71                       | 0.36 | 1.39  | 0.27                                            | 0.06 | 1.28  |
|                           | University           | 0.73                       | 0.37 | 1.47  | 0.22                                            | 0.03 | 1.55  |
|                           | Grad/Post-Grad       | 0.59                       | 0.26 | 1.31  | 0.15                                            | 0.02 | 1.29  |
| <b>Income</b>             | <\$40,000            | 1.00                       | -    | -     | 1.00                                            | -    | -     |
|                           | \$40,000-\$80,000    | 1.08                       | 0.54 | 2.17  | 0.71                                            | 0.28 | 1.83  |
|                           | >\$80,000            | 1.05                       | 0.52 | 2.14  | 0.51                                            | 0.14 | 1.88  |
|                           | Prefer not to answer | 1.36                       | 0.63 | 2.94  | 1.04                                            | 0.44 | 2.43  |
| <b>Region</b>             | West                 | 1.00                       | -    | -     | 1.00                                            | -    | -     |
|                           | Ontario              | 1.04                       | 0.61 | 1.77  | 1.27                                            | 0.70 | 2.32  |
|                           | Quebec               | 0.48                       | 0.22 | 1.06  | 0.69                                            | 0.27 | 1.78  |
|                           | East                 | 1.78                       | 0.82 | 3.83  | 2.06                                            | 0.94 | 4.49  |
|                           | Territories          | 1.47                       | 0.31 | 6.95  | 1.16                                            | 0.26 | 5.20  |
| <b>Sexual minority</b>    | No                   | 1.00                       | -    | -     | 1.00                                            | -    | -     |
|                           | Yes                  | 0.25                       | 0.03 | 1.79  | 0.17                                            | 0.03 | 1.16  |
| <b>Propensity score</b>   |                      |                            |      |       | 84.81                                           | 0.12 | 60526 |

LLC=lower limit of 95% confidence interval, ULC= upper limit of 95% confidence interval

**Supplementary Table 7:** Logistic regression analysis of association between mode of questionnaire completion and missing/DK response for comfort with shopping at small grocery store owned by someone who has HIV/AIDS (n=2027).

| Variable                  | Response Category    | Socio-demographic adjusted |      |      | Socio-demographic and propensity score adjusted |      |       |
|---------------------------|----------------------|----------------------------|------|------|-------------------------------------------------|------|-------|
|                           |                      | Odds Ratio                 | LLC  | ULC  | Odds Ratio                                      | LLC  | ULC   |
| <b>Mode of completion</b> | Telephone            | 1.00                       | -    | -    | 1.00                                            | -    | -     |
|                           | Web                  | 2.99                       | 1.41 | 6.33 | 3.12                                            | 1.47 | 6.63  |
| <b>Age</b>                | 18-24                | 1.00                       | -    | -    | 1.00                                            | -    | -     |
|                           | 25-39                | 0.94                       | 0.42 | 2.14 | 0.90                                            | 0.39 | 2.03  |
|                           | 40-49                | 0.70                       | 0.26 | 1.86 | 0.55                                            | 0.20 | 1.57  |
|                           | 50-59                | 1.53                       | 0.66 | 3.56 | 1.20                                            | 0.46 | 3.14  |
|                           | 60+                  | 1.27                       | 0.54 | 2.97 | 0.84                                            | 0.26 | 2.76  |
| <b>Gender</b>             | Male                 | 1.00                       | -    | -    | 1.00                                            | -    | -     |
|                           | Female               | 0.84                       | 0.54 | 1.31 | 0.81                                            | 0.52 | 1.27  |
| <b>Education</b>          | ≤High school         | 1.00                       | -    | -    | 1.00                                            | -    | -     |
|                           | College              | 0.54                       | 0.30 | 1.00 | 0.94                                            | 0.25 | 3.59  |
|                           | University           | 0.54                       | 0.29 | 0.99 | 1.04                                            | 0.22 | 4.97  |
|                           | Grad/Post-Grad       | 0.31                       | 0.13 | 0.70 | 0.67                                            | 0.10 | 4.31  |
| <b>Income</b>             | <\$40,000            | 1.00                       | -    | -    | 1.00                                            | -    | -     |
|                           | \$40,000-\$80,000    | 0.61                       | 0.32 | 1.17 | 0.77                                            | 0.34 | 1.73  |
|                           | >\$80,000            | 0.86                       | 0.46 | 1.62 | 1.26                                            | 0.46 | 3.44  |
|                           | Prefer not to answer | 2.16                       | 1.13 | 4.13 | 2.50                                            | 1.23 | 5.08  |
| <b>Region</b>             | West                 | 1.00                       | -    | -    | 1.00                                            | -    | -     |
|                           | Ontario              | 0.68                       | 0.41 | 1.14 | 0.61                                            | 0.34 | 1.09  |
|                           | Quebec               | 0.93                       | 0.53 | 1.64 | 0.75                                            | 0.34 | 1.67  |
|                           | East                 | 0.26                       | 0.06 | 1.11 | 0.24                                            | 0.06 | 1.04  |
|                           | Territories          | 1.39                       | 0.33 | 5.96 | 1.56                                            | 0.37 | 6.65  |
| <b>Sexual minority</b>    | No                   | 1.00                       | -    | -    | 1.00                                            | -    | -     |
|                           | Yes                  | 0.20                       | 0.03 | 1.51 | 0.24                                            | 0.03 | 1.83  |
| <b>Propensity score</b>   |                      |                            |      |      | 0.09                                            | 0.00 | 12.78 |

LLC=lower limit of 95% confidence interval, ULC= upper limit of 95% confidence interval

**Supplementary Table 8:** Logistic regression analysis of association between mode of questionnaire completion and missing/DK response for most concerning illness or disease (n=2027).

| Variable                  | Response Category    | Socio-demographic adjusted |      |      | Socio-demographic and propensity score adjusted |      |       |
|---------------------------|----------------------|----------------------------|------|------|-------------------------------------------------|------|-------|
|                           |                      | Odds Ratio                 | LLC  | ULC  | Odds Ratio                                      | LLC  | ULC   |
| <b>Mode of completion</b> | Telephone            | 1.00                       | -    | -    | 1.00                                            | -    | -     |
|                           | Web                  | 3.01                       | 1.68 | 5.38 | 3.02                                            | 1.67 | 5.47  |
| <b>Age</b>                | 18-24                | 1.00                       | -    | -    | 1.00                                            | -    | -     |
|                           | 25-39                | 1.45                       | 0.83 | 2.52 | 1.44                                            | 0.83 | 2.51  |
|                           | 40-49                | 1.10                       | 0.58 | 2.08 | 1.07                                            | 0.53 | 2.15  |
|                           | 50-59                | 1.07                       | 0.59 | 1.96 | 1.04                                            | 0.53 | 2.04  |
|                           | 60+                  | 1.11                       | 0.62 | 1.99 | 1.06                                            | 0.47 | 2.37  |
| <b>Gender</b>             | Male                 | 1.00                       | -    | -    | 1.00                                            | -    | -     |
|                           | Female               | 0.68                       | 0.50 | 0.93 | 0.68                                            | 0.50 | 0.93  |
| <b>Education</b>          | ≤High school         | 1.00                       | -    | -    | 1.00                                            | -    | -     |
|                           | College              | 0.88                       | 0.56 | 1.39 | 0.95                                            | 0.37 | 2.46  |
|                           | University           | 0.84                       | 0.52 | 1.35 | 0.91                                            | 0.29 | 2.87  |
|                           | Grad/Post-Grad       | 0.68                       | 0.38 | 1.21 | 0.75                                            | 0.20 | 2.86  |
| <b>Income</b>             | <\$40,000            | 1.00                       | -    | -    | 1.00                                            | -    | -     |
|                           | \$40,000-\$80,000    | 0.88                       | 0.57 | 1.36 | 0.91                                            | 0.54 | 1.53  |
|                           | >\$80,000            | 0.76                       | 0.49 | 1.18 | 0.79                                            | 0.40 | 1.59  |
|                           | Prefer not to answer | 1.62                       | 1.00 | 2.62 | 1.64                                            | 0.98 | 2.76  |
| <b>Region</b>             | West                 | 1.00                       | -    | -    | 1.00                                            | -    | -     |
|                           | Ontario              | 0.78                       | 0.54 | 1.12 | 0.77                                            | 0.51 | 1.15  |
|                           | Quebec               | 0.90                       | 0.59 | 1.36 | 0.87                                            | 0.53 | 1.45  |
|                           | East                 | 0.81                       | 0.42 | 1.54 | 0.80                                            | 0.41 | 1.53  |
|                           | Territories          | 0.69                       | 0.15 | 3.10 | 0.70                                            | 0.16 | 3.07  |
| <b>Sexual minority</b>    | No                   | 1.00                       | -    | -    | 1.00                                            | -    | -     |
|                           | Yes                  | 1.19                       | 0.63 | 2.25 | 1.22                                            | 0.63 | 2.36  |
| <b>Propensity score</b>   |                      |                            |      |      | 0.72                                            | 0.01 | 37.30 |

LLC=lower limit of 95% confidence interval, ULC= upper limit of 95% confidence interval
